# Supplementary material
Source: PubMed Central journal article supplement (PMC11493886)

# Supplemental Figure S1

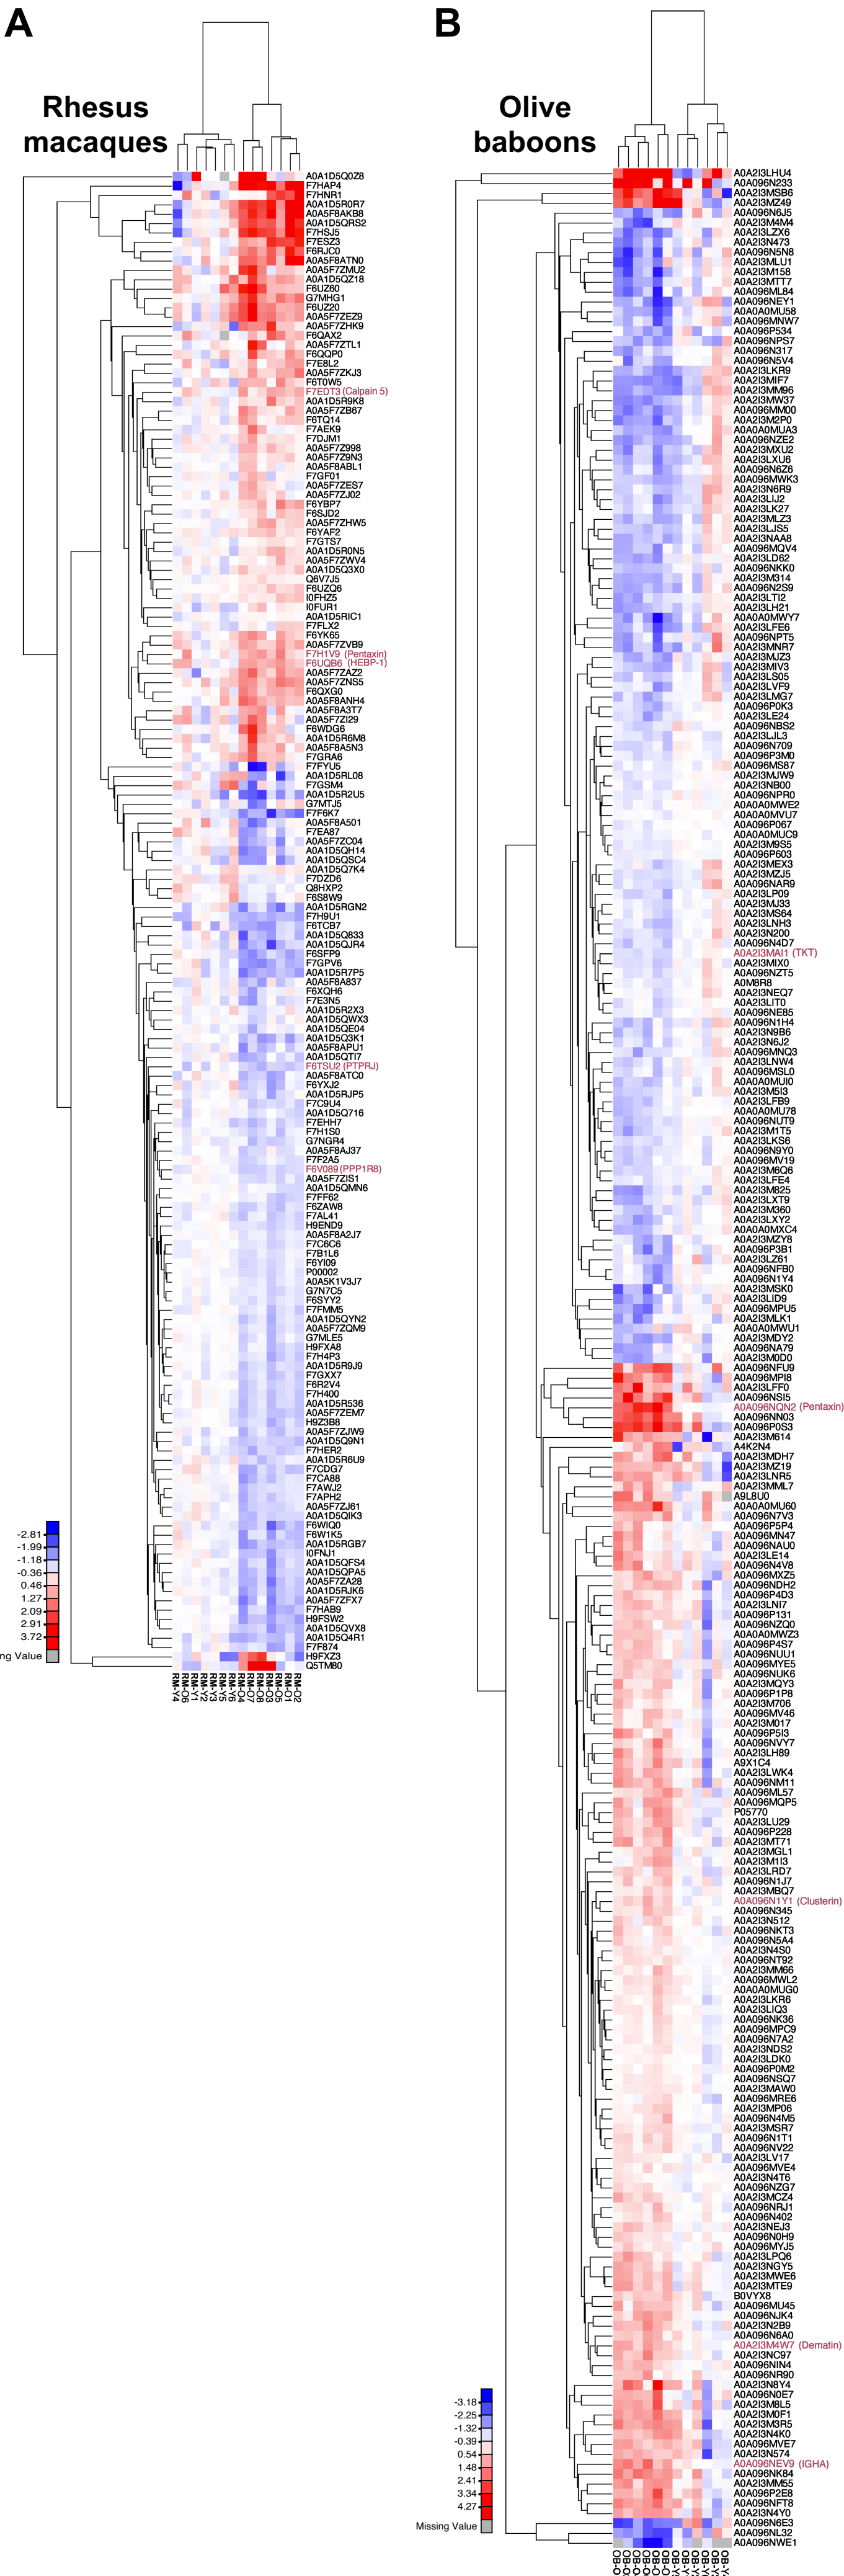

Supplement: 11357_2024_1264_MOESM1_ESM.pdf [file 11357_2024_1264_MOESM1_ESM.pdf]
